# Supplementary material for: Interpolation of Point Prevalence Rate of the Highly Pathogenic Avian Influenza Subtype H5N8 Second Phase Epidemic in South Korea
Source: MDPI journal article supplement (doi:10.3390/vetsci9030139), 2022-03-16
Supplement: s1 [file s1]

Supplementary Figure 1. Shows the the trend in the point prevalence data

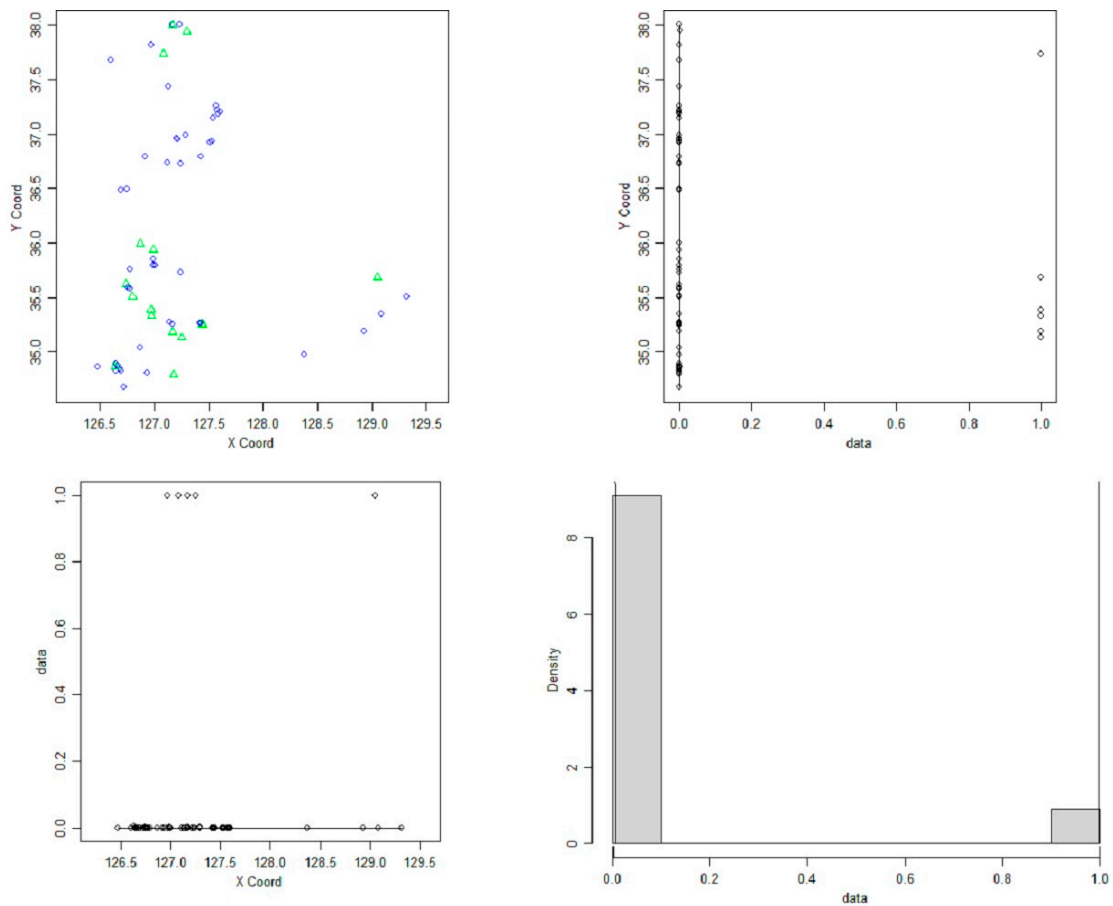

Supplementary Table S1. Summary of spherical variogram model to best fit the data

|                                    |            |
|------------------------------------|------------|
| summary(VarioMod_sph)              |            |
| \$pmethod                          |            |
| [1] "WLS (weighted least squares)" |            |
| \$cov.model                        |            |
| [1] "spherical"                    |            |
| \$spatial.component                |            |
| sigmasq                            | phi        |
| 0.07330318                         | 0.20875158 |
| \$spatial.component.extra          |            |
| kappa                              |            |
| 0.5                                |            |
| \$nugget.component                 |            |
| tausq                              |            |
| 0.009230274                        |            |

|                                            |
|--------------------------------------------|
| \$fix.nugget                               |
| [1] FALSE                                  |
| \$fix.kappa                                |
| [1] TRUE                                   |
| \$practicalRange                           |
| [1] 0.2087516                              |
| \$sum.of.squares                           |
| value                                      |
| 2.745433                                   |
| \$estimated.pars                           |
| tausq sigmasq phi                          |
| 0.009230274 0.073303184 0.208751579        |
| \$weights                                  |
| [1] "npairs"                               |
| \$call                                     |
| variofit(vario = Vario, cov.model = "sph") |
| attr(,"class")                             |
| [1] "summary.variomodel"                   |

Supplementary Table S2. Summary of Exponential variogram model

|                                    |
|------------------------------------|
| summary(VarioMod_exp)              |
| \$pmethod                          |
| [1] "WLS (weighted least squares)" |
| \$cov.model                        |
| [1] "exponential"                  |
| \$spatial.component                |
| sigmasq phi                        |
| 0.0788204422 0.0007487053          |
| \$spatial.component.extra          |
| kappa                              |
| 0.5                                |
| \$nugget.component                 |
| tausq                              |
| 0                                  |
| \$fix.nugget                       |
| [1] FALSE                          |
| \$fix.kappa                        |
| [1] TRUE                           |
| \$practicalRange                   |
| [1] 0.00223611                     |
| \$sum.of.squares                   |
| value                              |
| 3.047481                           |
| \$estimated.pars                   |

|                                            |              |              |
|--------------------------------------------|--------------|--------------|
| tausq                                      | sigmasq      | phi          |
| 0.0000000000                               | 0.0788204422 | 0.0007487053 |
| \$weights                                  |              |              |
| [1] "npairs"                               |              |              |
| \$call                                     |              |              |
| variofit(vario = Vario, cov.model = "exp") |              |              |
| attr(,"class")                             |              |              |
| [1] "summary.variomodel"                   |              |              |
